# Supplementary material for: Crystallization of highly supercooled glass-forming alloys induced by anomalous surface wetting
Source: Royal Society of Chemistry journal article supplement (doi:10.1039/c9cp07021d), 2020-01-01
Supplement: c9cp07021d1.pdf [file c9cp07021d1.pdf]

Cite this: DOI: 00.0000/xxxxxxxxxx

## Supplemental Material for Crystallization of Highly Supercooled Glass-forming Alloys Induced by Anomalous Surface Wetting<sup>†</sup>

Qingling Bi,<sup>ab</sup> Chenchen Guo,<sup>a</sup> and Yongjun Lü<sup>\*a</sup>

Received Date

Accepted Date

DOI: 00.0000/xxxxxxxxxx

<sup>a</sup> School of Physics, Beijing Institute of Technology, Beijing 100081, P. R. China, E-mail: yongjunlv@bit.edu.cn

<sup>b</sup> Southwest Institute of Technical Physics, Chengdu, Sichuan 610041, P. R. China

# 1 Computational Methods

## 1.1 The mean first-passage time method

The mean first-passage time (MFPT)  $\tau(x)$  is defined as the average elapsed time that a system reaches the state  $x$  from its initial state  $x_0$  for the first time. For an activated process,  $\tau(x)$  shows a sigmoidal shape. The dynamics of many activated processes can be described in terms of the Fokker-Planck<sup>1</sup>

$$\frac{\partial P(x,t)}{\partial t} = \frac{\partial}{\partial x} [D(x)e^{-\beta\Delta G(x)} \frac{\partial}{\partial x} (P(x,t)e^{\beta\Delta G(x)})] = -\frac{\partial J(x,t)}{\partial t}, \quad (1)$$

where  $P(x,t)$  is the probability density for the state  $x$  at time  $t$ .  $D(x)$  is the generalized diffusion coefficient,  $J(x,t)$  is the state current,  $\Delta G(x)$  is the free energy difference and  $\beta = 1/k_B T$ . The MFPT for an activated process described in Eq. 1 is then given by

$$\tau(x) = \int_{x_0}^x \frac{1}{D(y)} dy \exp[\beta\Delta G(y)] \int_a^y dz \exp[-\beta\Delta G(z)], \quad (2)$$

We use the embryo size,  $n$ , to identify the thermodynamic state during nucleation. Eq. 2 can be fitted by the following expression<sup>2</sup>,

$$\tau(n) = \frac{1}{2JV} [1 + \text{erf}((n - n^*)c)], \quad (3)$$

where  $n^*$  is the critical size of the nucleus,  $J$  is the nucleation rate,  $\text{erf}(x)$  is the error function, and  $c = \sqrt{|\Delta G''(n^*)|/2k_B T}$ . From the fit of  $\tau(n)$ ,  $J$  and  $n^*$  are obtained accordingly.

If the system reaches the steady state, ie  $\partial P_{st}(x)/\partial t = 0$ , Eq.1 can be rewritten as,

$$\frac{\partial(\beta\Delta G(x))}{\partial x} = -\frac{\partial \ln P_{st}(x)}{\partial x} - \frac{J}{D(x)P_{st}(x)}, \quad (4)$$

upon integration yields

$$\beta\Delta G(x) = -\ln P_{st}(x) - J \int \frac{dx'}{D(x')P_{st}(x')} + C, \quad (5)$$

The free energy barrier is then given by<sup>3,4</sup>

$$\beta\Delta G(x) = \ln[B(x)] - \int_{a'}^x \frac{dx'}{B(x')} + C, \quad (6)$$

where

$$B(x) = \frac{1}{P_{st}(x)} \left[ \int_0^x P_{st}(x') dx' - JV\tau(x) \right]. \quad (7)$$

Using the knowledge of  $P(n,t)$ ,  $J$  and  $\tau(n)$ , the nucleation barrier is calculated.

## 2 Supplemental Figures

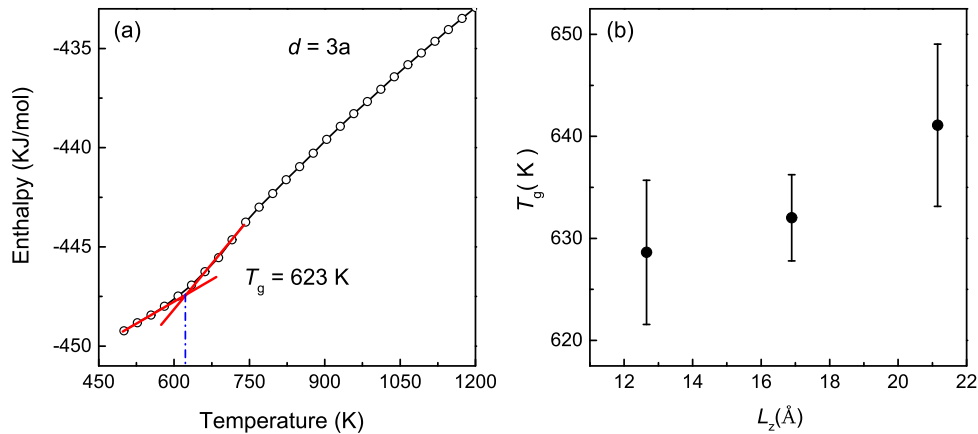

**Fig. 1** The glass transition temperature  $T_g$  of  $\text{Cu}_{50}\text{Zr}_{50}$  film. (a) The film with the thickness of  $d = 3a$ . (b)  $T_g$  as a function of thickness

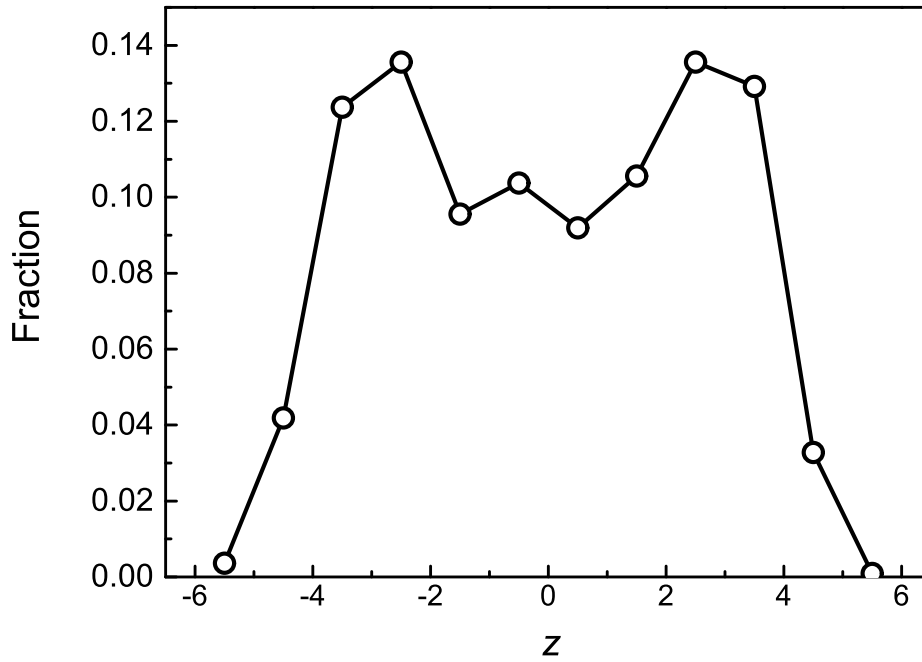

**Fig. 2** The location distributions of crystal nucleus for  $\text{Cu}_{50}\text{Zr}_{50}$  film with the thickness of  $d = 3a$  along the  $z$  direction.

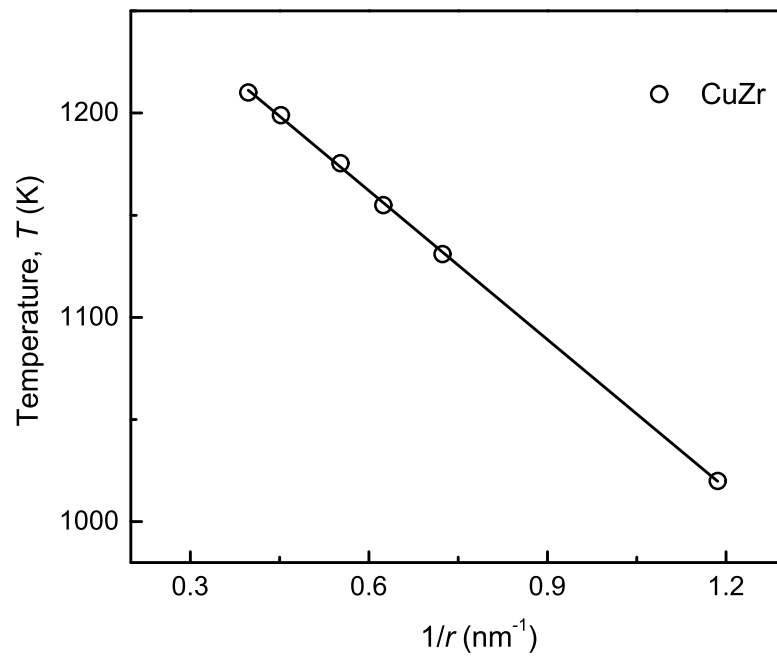

**Fig. 3** The liquid-solid equilibrium temperature of sphere-like nucleus versus the inverse of nucleus radius for CuZr. The solid lines are linear fits.

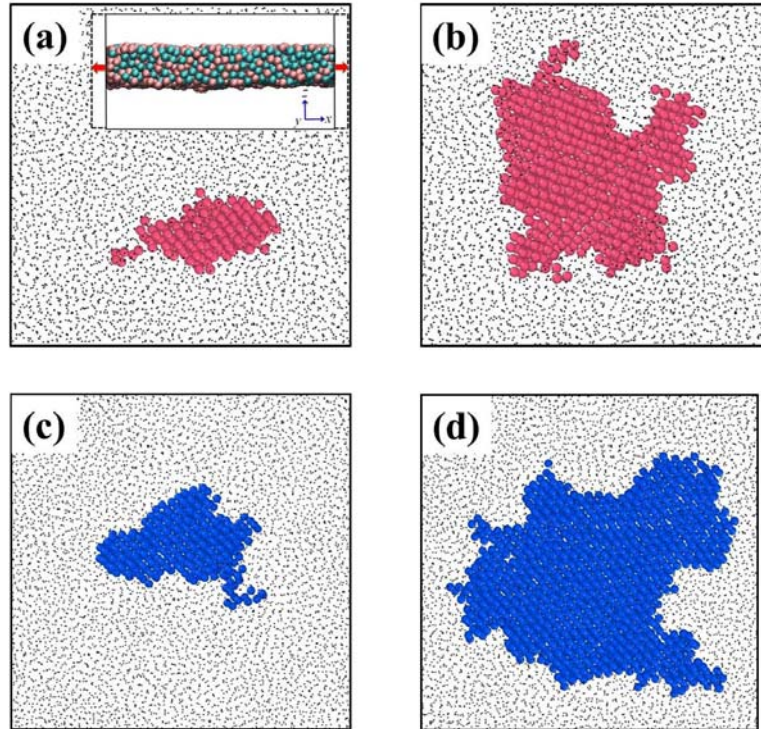

**Fig. 4** Morphological evolution of crystal clusters in  $\text{Cu}_{50}\text{Zr}_{50}$  liquid films. The red balls in (a) and (b) represent the cluster shapes for  $d = 4a$  at 800 K and the blue balls in (c) and (d) refer to the cluster for  $d = 5a$  at 800 K, respectively. The gray dots denote the liquid-like atoms.

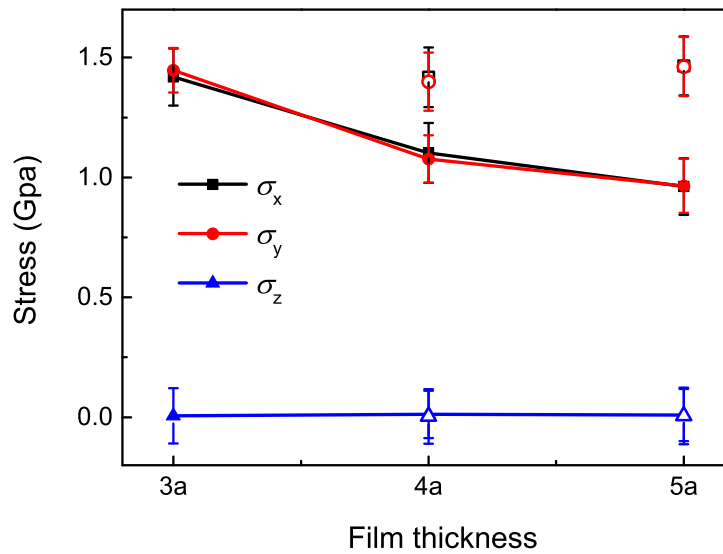

**Fig. 5** Stress along the  $x$ ,  $y$ , and  $z$  directions for  $\text{Cu}_{50}\text{Zr}_{50}$  film with different thickness ( $a = 4.22 \text{ \AA}$ , the lattice constant of CuZr compound), the open symbols denote the value of samples when the tensile stresses are applied.

## References

- 1 P. R. Wolde *et al.*, *Faraday discussions*, 1996, **104**, 93–110.
- 2 Y. L. , X. Zhang, M. Chen and J.-Z. Jiang, *Phys. Chem. Chem. Phys.*, 2015, **17**, 27167–27175.
- 3 J. Wedekind, R. Strey and D. Reguera, *J. Chem. Phys.*, 2007, **126**, 134103.
- 4 J. Wedekind and D. Reguera, *J. Phys. Chem. B*, 2008, **112**, 11060–11063.
